# Supplementary material for: Hydrothermal fabrication of natural sun light active Dy2WO6 doped ZnO and its enhanced photo-electrocatalytic activity and self-cleaning properties
Source: Royal Society of Chemistry journal article supplement (doi:10.1039/c6ra24843h), 2017-01-01
Supplement: c6ra24843h1.pdf [file c6ra24843h1.pdf]

## Supporting Information

# Hydrothermal fabrication of natural sun light active $\text{Dy}_2\text{WO}_6$ doped ZnO and its enhanced Photo – Electrocatalytic activity and Self–Cleaning properties

K. Thirumalai, M. Shanthi and M. Swaminathan\*

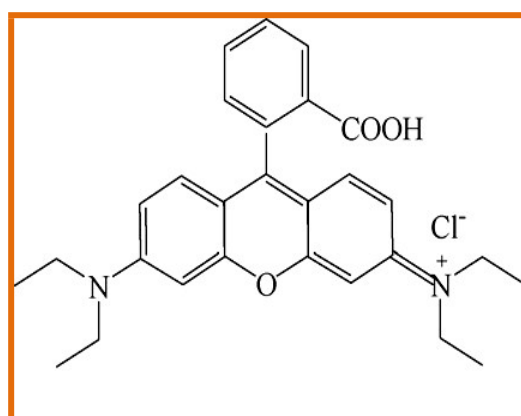

**Rhodamine-B**

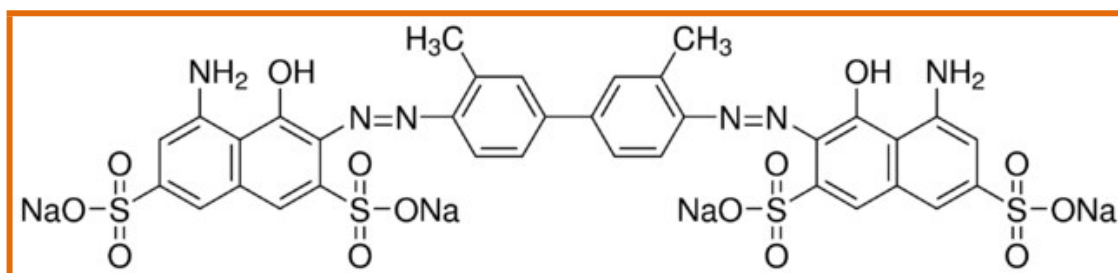

**Trypan Blue**

**Figure.S1** Chemical Structure of dyes

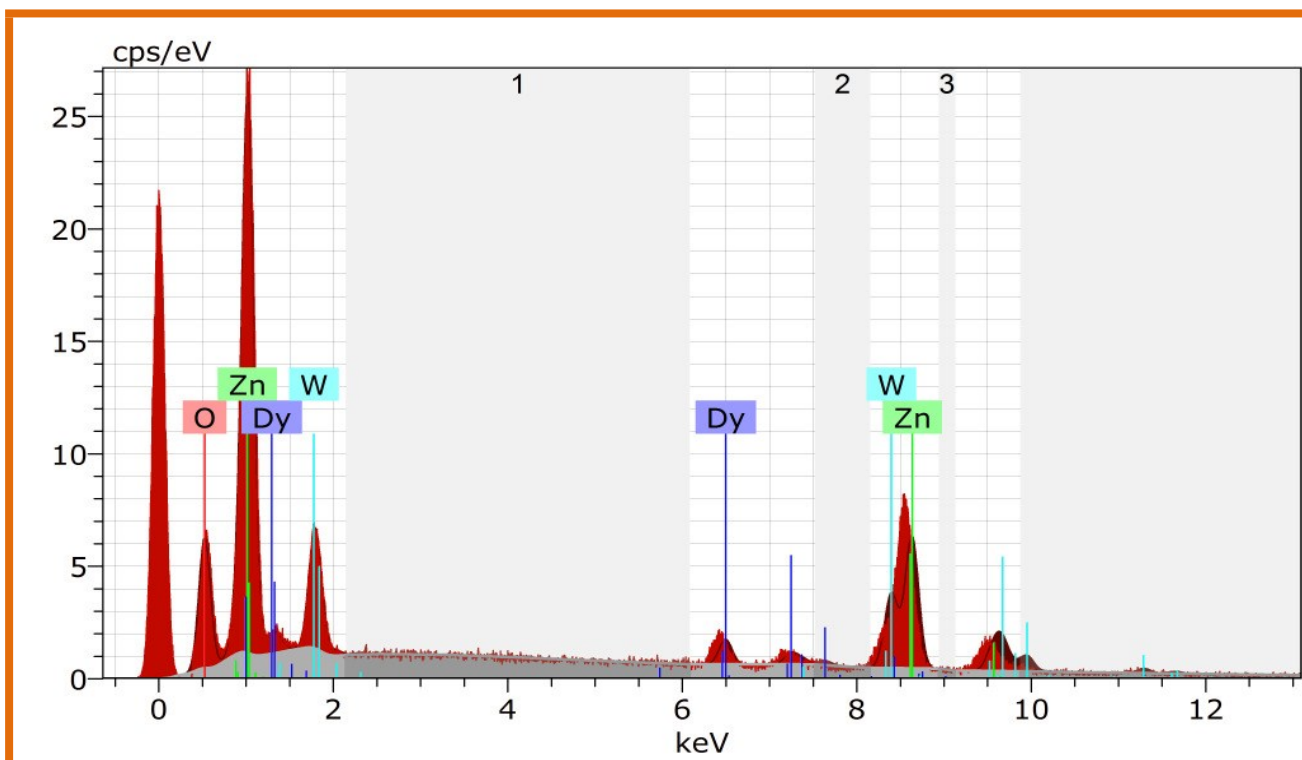

**Spectrum: Dy<sub>2</sub>WO<sub>6</sub>-ZnO**

| Element    | Series   | unn.<br>[wt.%] | C norm.<br>[wt.%] | C Atom.<br>[at.%] | C Error (3 Sigma)<br>[wt.%] |
|------------|----------|----------------|-------------------|-------------------|-----------------------------|
| Oxygen     | K-series | 24.47          | 23.89             | 68.00             | 9.94                        |
| Zinc       | K-series | 29.49          | 28.79             | 20.05             | 2.58                        |
| Dysprosium | L-series | 7.19           | 7.01              | 1.97              | 0.73                        |
| Tungsten   | L-series | 41.29          | 40.30             | 9.98              | 3.63                        |
| Total:     |          | 102.44         | 100.00            | 100.00            |                             |

**Figure.S2** EDS spectrum of Dy<sub>2</sub>WO<sub>6</sub>-ZnO

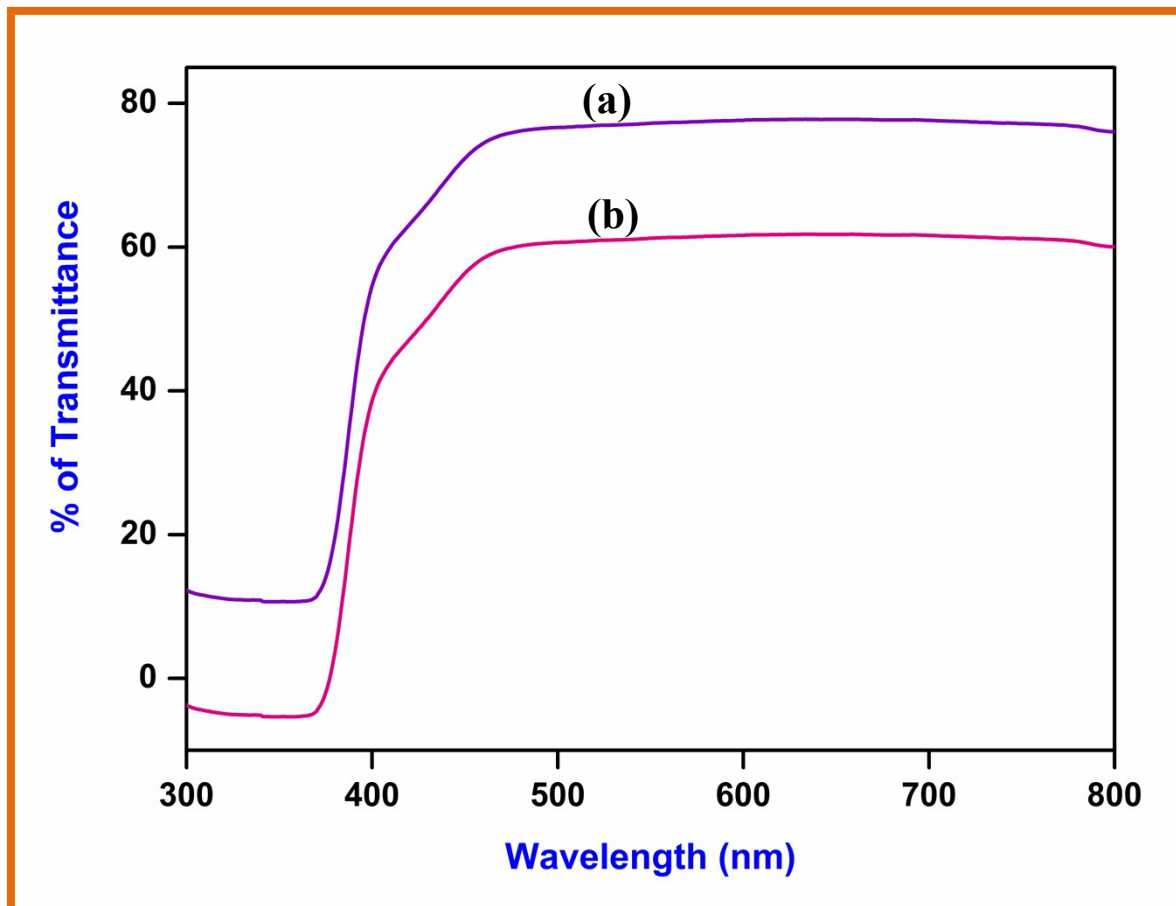

**Figure.S3** Diffused reflectance spectrum of Dy<sub>2</sub>WO<sub>6</sub>-ZnO (a) prepared ZnO and (b) Dy<sub>2</sub>WO<sub>6</sub> doped ZnO

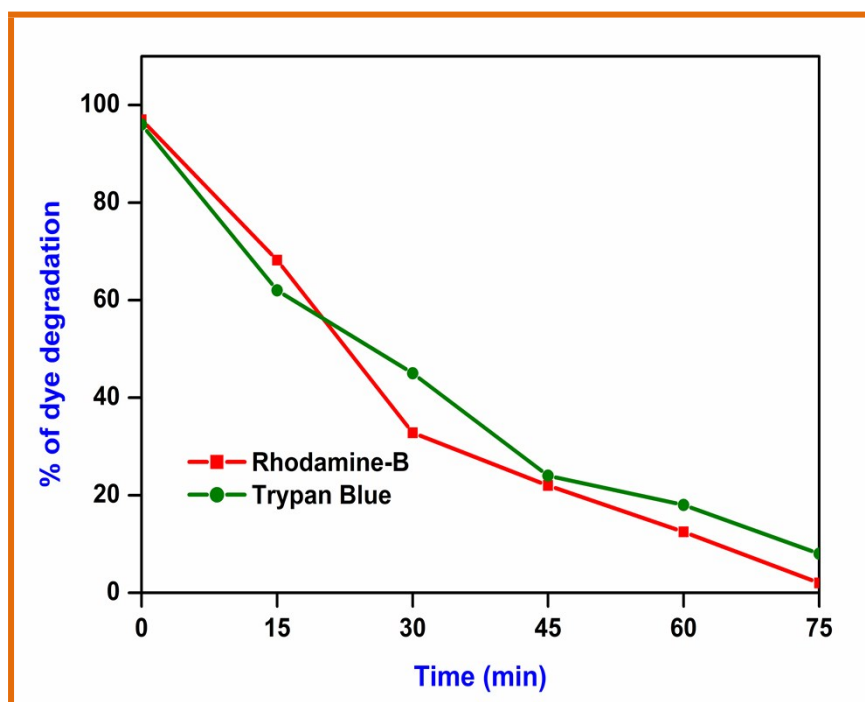

**Figure.S4** Photodegradability of Rh-B and TB with  $\text{Dy}_2\text{WO}_6\text{-ZnO}$ : dye concentration Rh-B =  $3 \times 10^{-4}$  M, catalyst suspended =  $3 \text{ g L}^{-1}$ , pH = 7, airflow rate =  $8.1 \text{ mL s}^{-1}$  and irradiation time 75 min,  $I_{\text{solar}} = 1250 \times 100 \text{ Lux} \pm 100$  (b) TB dye concentration =  $1 \times 10^{-4}$  M, catalyst suspended =  $3 \text{ g L}^{-1}$ , pH = 7, airflow rate =  $8.1 \text{ mL s}^{-1}$  and irradiation time 75 min,  $I_{\text{solar}} = 1250 \times 100 \text{ Lux} \pm 100$ .

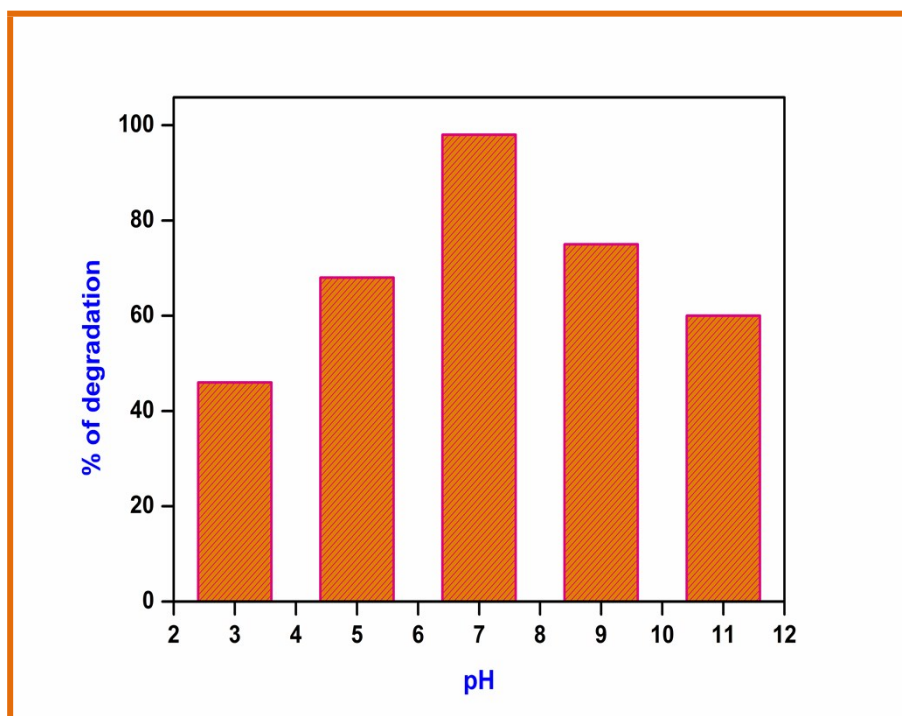

**Figure.S5** Effect of pH on degradation of Rh-B dye

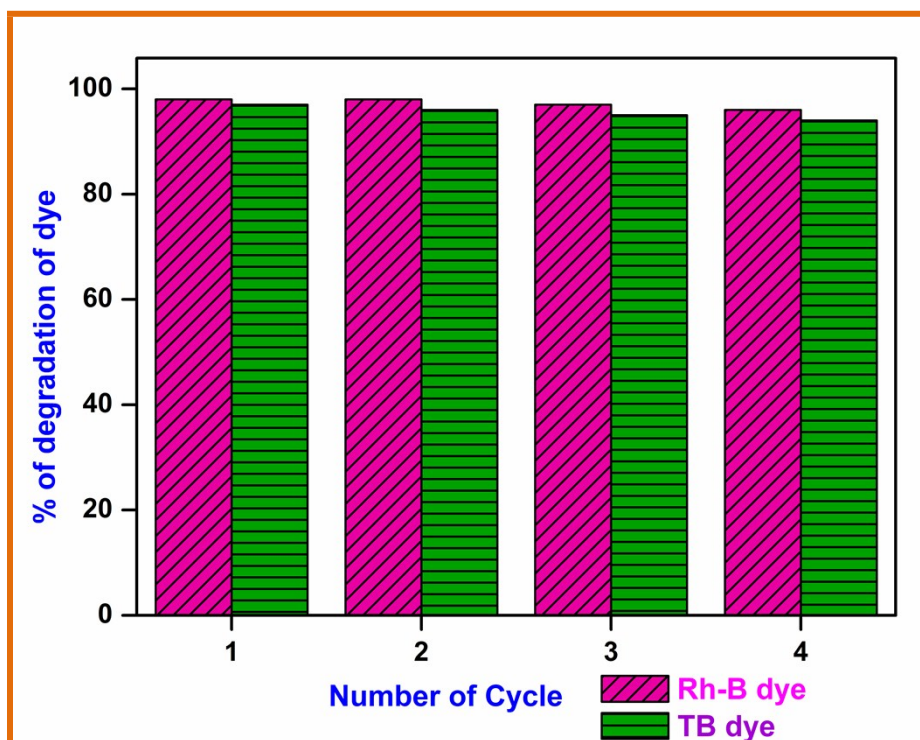

**Figure.S6** Reusability of  $\text{Dy}_2\text{WO}_6\text{-ZnO}$  on Rh-B degradation dye concentration =  $3 \times 10^{-4}$  M, catalyst suspended =  $3 \text{ g L}^{-1}$ , pH = 7, airflow rate =  $8.1 \text{ mL s}^{-1}$  and irradiation time 75 min,  $I_{\text{solar}} = 1250 \times 100 \text{ Lux} \pm 100$ .

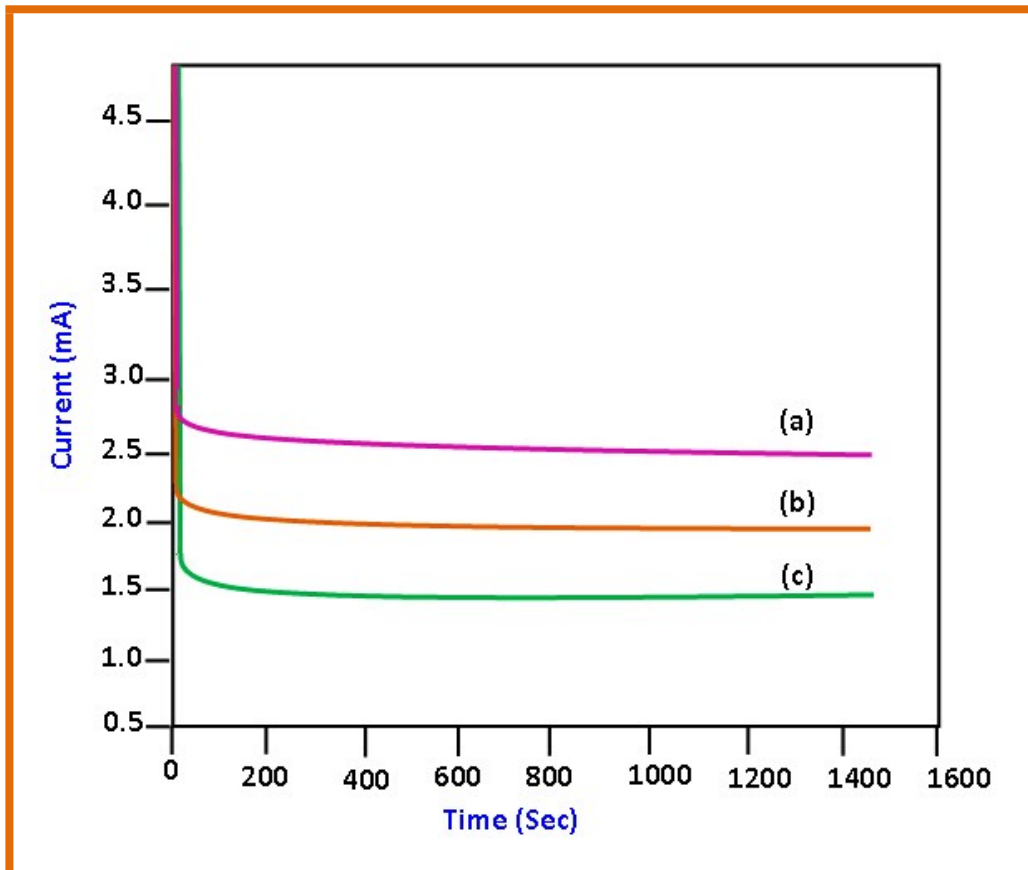

**Figure.S7** Chronoamperometry curves of (a)  $\text{Dy}_2\text{WO}_6\text{-ZnO}$  (b)  $\text{Dy}_2\text{WO}_6$  and (c) Prepared ZnO in  $\text{N}_2$  and saturated 0.5 M NaOH + 0.5 M  $\text{CH}_3\text{OH}$  solution at an operation potential of 0.1 V at 25° C.
